# Supplementary material for: Wild-Type p53 Overexpression in NPM1-Mutated AML: Potential Implications for Disease Biology and Therapy Response
Source: Research Square preprint supplement (doi:10.21203/rs.3.rs-5214655/v1), 2024-10-09
Supplement: Supplementary file 1 [file 4a6cf5d1a96c921427c8fffa.docx]

**SUPPLEMENTAL METHODS**

*Re-Analysis of Chromatin Immunoprecipitation Sequencing (ChIP-SEQ) Data*

ChIP bigwig files with and without degron treatment were downloaded from GSE197387(https://doi.org/10.1158/2159-8290.CD-22-0424).

*Clinicopathologic and Laboratory Data*

The pathology archives from Weill Cornell Medical College/NewYork-Presbyterian Hospital were queried for historical cases of acute myeloid leukemia with mutated *NPM1*. Cases were available formalin-fixed paraffin-embedded clot section material were retrieved for further studies (n=33); cases included a mixture of males and females (M:F = 0.83:1) with a median age of 58. In addition, a representative sample of *NPM1*-wild type AML cases with either *TP53* mutation (n=5) or normal karyotype (n=7) were similarly identified. Given the limited number of archival material available for additional studies, a specific power analysis was not performed. The electronic medical record (EMR) for each patient included in the study was reviewed to obtain data concurrent with the evaluated biopsy specimen, including CBC data including hemoglobin concentration (Hb), white blood cell count (WBC), and platelet count (Plt). All diagnostic hematopathology reports were re-reviewed (PDB, SSP) to confirm the original diagnosis and AML sub-classification, and extract demographic information and data related to manual aspirate differential counting, namely percentages of blasts. Details for all *NPM1*-AML samples are provided in **Table 1**.

*Duplex Chromogenic Immunohistochemistry and MxIF Tissue Staining*

Duplex chromogenic immunohistochemistry (anti-mutant NPM1 and p53 antibodies, see below for clone details and conditions) was performed in a BondRx (Leica Biosystems) following standard protocols, after deparaffinized prior to EDTA-based antigen retrieval (Leica ER2 solution, 20 minutes). Multiplex immunofluorescence (MxIF) staining was performed using the Opal system as previously described (see main text references). Formalin-fixed paraffin-embedded sections of bone marrow aspirate material were first deparaffinized prior to EDTA-based antigen retrieval (Leica ER2 solution, 20 minutes). A cyclical staining protocol was then performed using horseradish peroxidase-mediated deposition of tyramide-Opal fluorophore constructs (Akoya Biosciences, Marlborough, MA) in each cycle; between each cycle, a combination of heat, citrate-based epitope retrieval solution (Leica ER1), and Bond Wash Solution (Leica) was used to remove primary/secondary antibody complex. Finally, 4’, 6-diamidino-2-phenylindole (Spectral DAPI, Akoya Biosciences) was applied per provided protocols to label nuclei. The following panel of primary antibody/fluorophore pairs was applied to all cases, in sequential order: 1) Opal 480/B2-microglobulin (A0072, RTU, Agilent, RRID:AB_812325), 2) Opal 520/p21 (12D1, 1:200, Cell Signaling Technologies, RRID:AB_823586), 3) Opal 570/anti-p53 (DO7, 1:100, Cell Signaling Technologies, RRID:AB_2713958), 4) Opal 620/Ki67 (MM1, RTU, Leica Biosystems), 5) Opal 690/anti-mutant NPM1 (PA1-46356, 1:3000, ThermoFisher, RRID:AB_2267471). All slides were cover-slipped using ProLong™ Diamond Antifade Mountant (Invitrogen). A second smaller panel including mutant NPM1, p53, and MDM2 (IF2, Invitrogen) was performed in three cases with among the highest p53 co-expression (NPM1c-15, NPMc-17, NPMc-18) to assess for cytoplasmic MDM2 dislocation. WSI scans were subsequently obtained at 20X magnification using the Phenoimager (formerly Vectra Polaris) Automated Quantitative Pathology Imaging System (Akoya Biosciences). The brightness (66) and contrast (-49) settings were adjusted for the representative images shown in Figure 2A only to enhance visualization (Photoshop, v 25.11). WSIs were tiled in Phenochart (v1.1, Akoya Biosciences); image tiles were subsequently spectrally unmixed in InForm (v2.4.8, Akoya Biosciences). Unmixed tiles were finally fused together in HALO (v3.6.4134.95, Indica Labs, Albuquerque, NM) to generate a single multi-layered TIFF image file for each sample, which was used in downstream analyses. Spectrally-unmixed WSIs were processed in HALO by two hematopathologists (P.B., S.S.P.); the analysis was focused on mutant NPM1, p53, and Ki67 staining due to inconsistent staining for p21 and lack of relevance to this study for B2-microglobulin. Steps of analysis included cell segmentation, visual thresholding of antigen expression for individual markers, and phenotyping (e.g. NPM1 mutant vs. WT, p53 positive vs. negative). Single cell matrices were output and further analyzed in R v.4.4.1 (RStudio version 2023.06.1 Build 524, RRID:SCR_000432). Investigators were blinded to p53 expression level and clinical outcome variables when performing the aforementioned analyses. Analysis code is available upon request.
