# Supplementary material for: Wild-Type p53 Overexpression in NPM1-Mutated AML: Potential Implications for Disease Biology and Therapy Response
Source: Research Square preprint supplement (doi:10.21203/rs.3.rs-5214655/v1), 2024-10-09
Supplement: Supplementary file 1 [file 7443d0ab4605cef45503b0aa.pdf]

| Group        | Number of cases per group | Minimum # cells | Maximum # cells | Median |
|--------------|---------------------------|-----------------|-----------------|--------|
| NPM1-mutated | 33                        | 1869            | 31151           | 10528  |
| TP53-mutated | 5                         | 3379            | 23273           | 8598   |
| NPM1/TP53 WT | 7                         | 2747            | 22935           | 8703   |
| All cases    | 45                        | 1869            | 31151           | 8957   |

**Supplemental Figure 1.** Total nucleated cells analyzed by MxIF across all cases/groups.

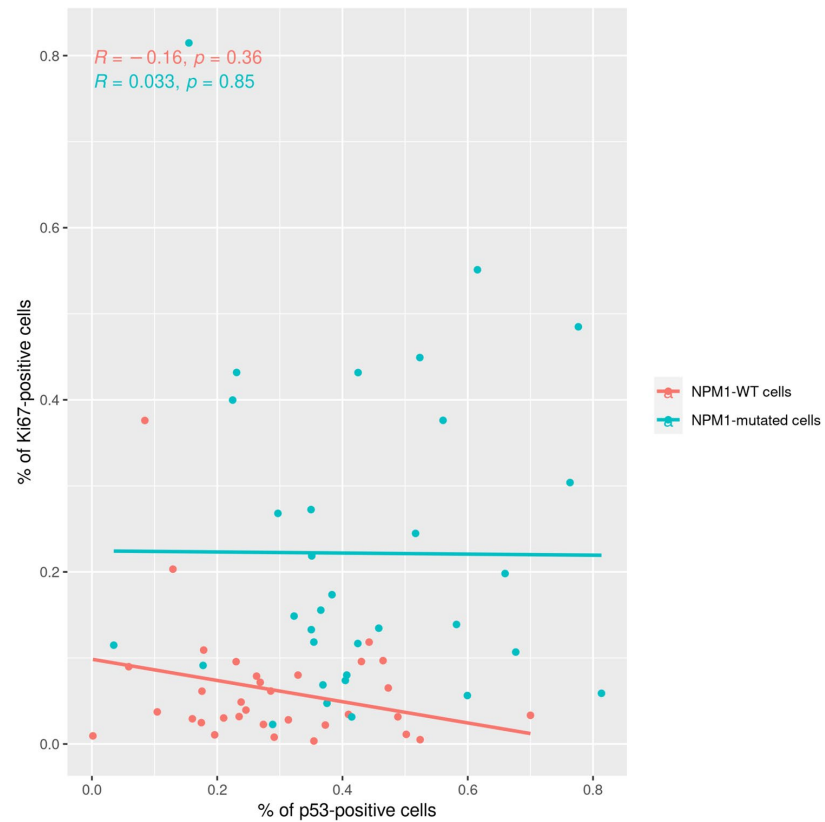

**Supplemental Figure 2.** No correlation between frequency of p53-positive and Ki67-positive cells in cases *NPM1*-AML.

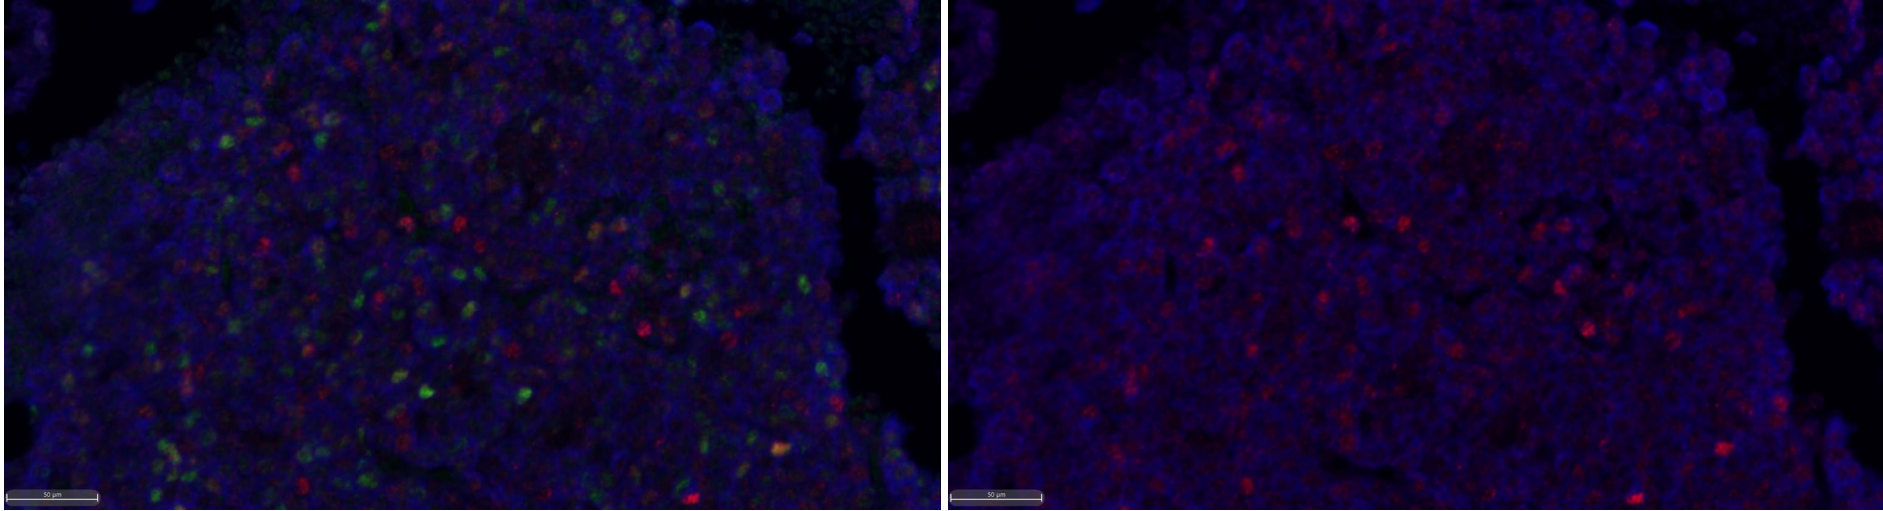

**Mutant NPM1** **p53** **MDM2**

**Supplemental Figure 3.** Representative example of an *NPM1*-AML case stained with antibodies to mutant NPM1 (blue), p53 (green), and MDM2 (red). The MDM2 signal is predominantly nuclear; evidence of cytoplasmic (i.e. blue/green overlap) dislocation of MDM2 is inconspicuous.

p53-positivity in NPM1-mutated cells

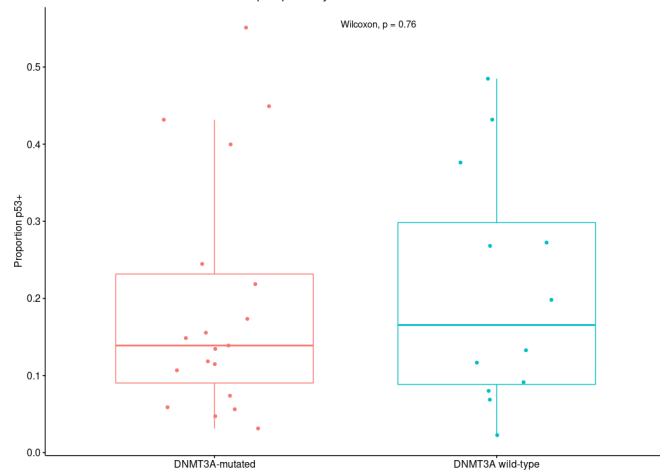

p53-positivity in NPM1-mutated cells

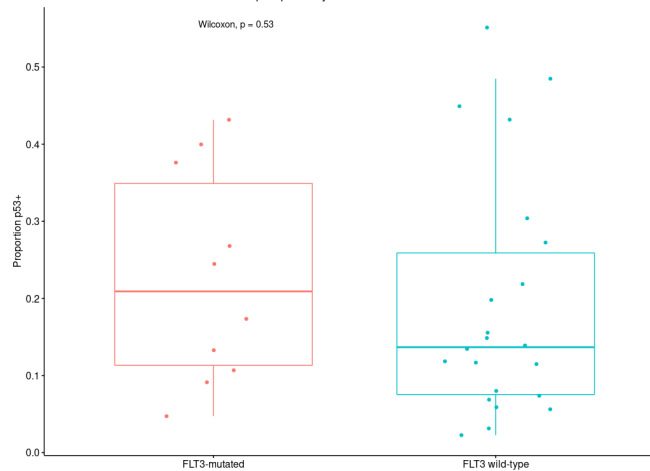

p53-positivity in NPM1-mutated cells

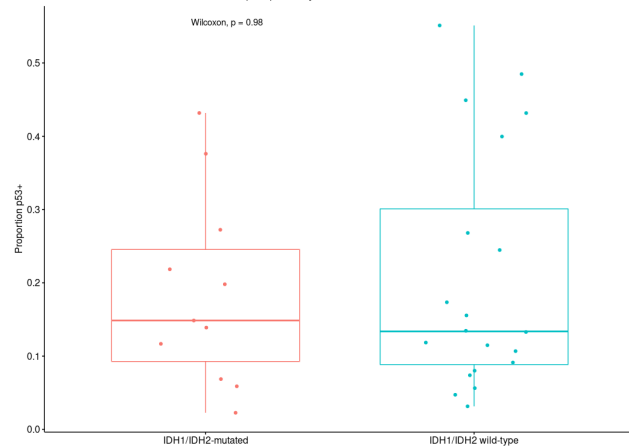

**Supplemental Figure 4.** Frequency of p53 expression among *NPM1*-mutated cells does not differ based on presence or absence of co-mutation in *DNMT3A* (top left), *FLT3*-ITD (top right), or *IDH1/2* (bottom left).

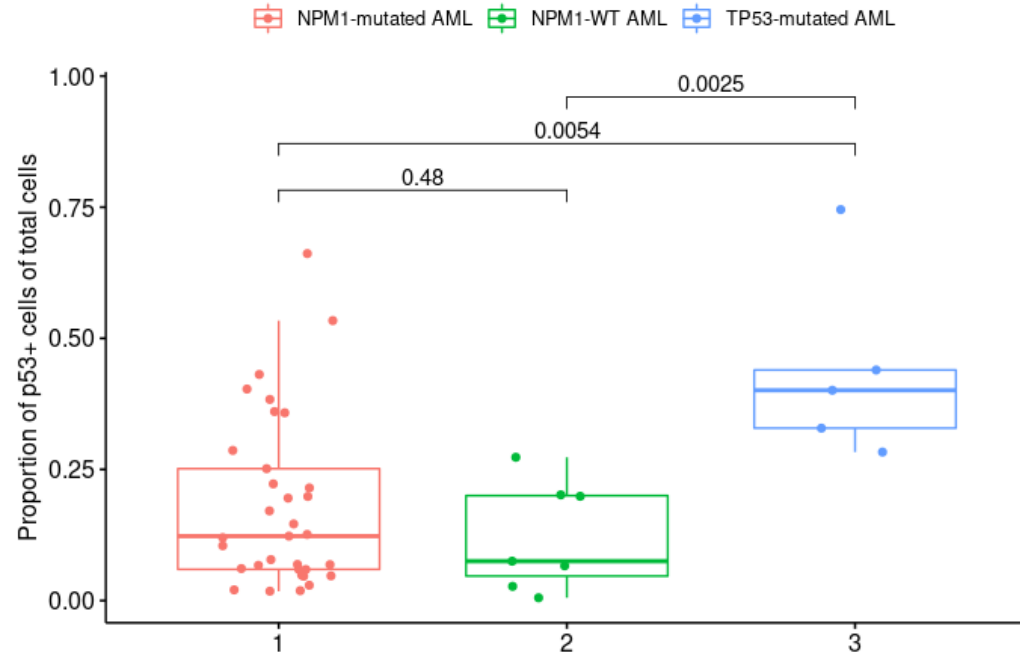

**Supplemental Figure 5.** *TP53*-AML cases (n=5) have the highest proportion of p53-positive cells, among all nucleated cells analyzed. No significant difference in frequency of p53 expression among total cells between *NPM1*-AML (n=33) and *TP53/NPM1*-WT AML cases with normal karyotype (n=7).

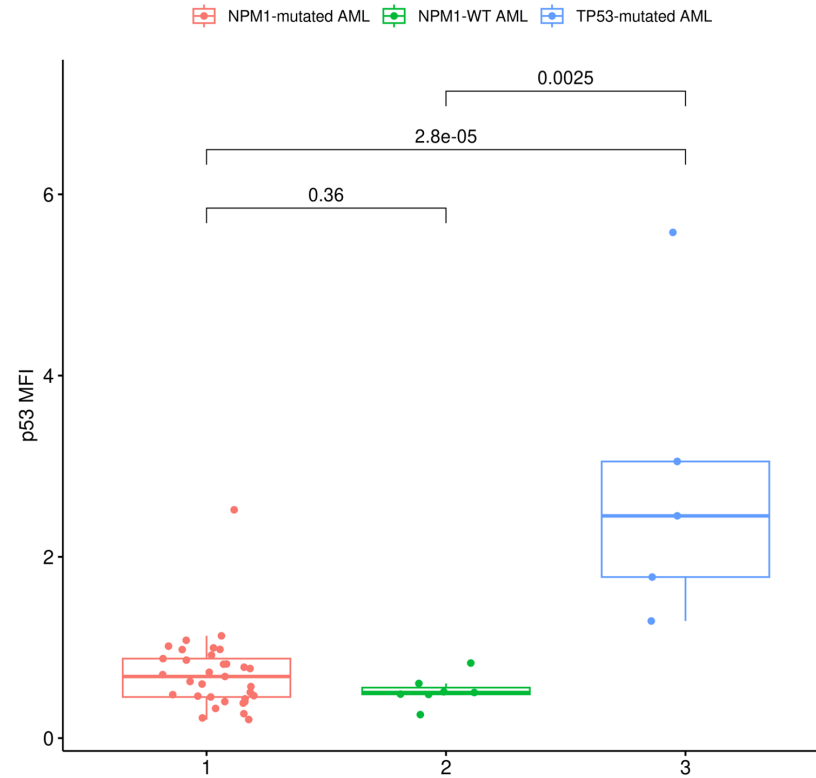

**Supplemental Figure 6.** The mean fluorescence intensity of p53 is highest in *TP53*-AML cases (n=5) compared to cases of *NPM1*-AML (n=33) and *NPM1*-WT AML with normal karyotype (n=7).
